# Supplementary material for: Consumer-centric resource accounting in the cloud
Source: Springer Nature journal article supplement (doi:10.1186/1869-0238-4-8), 2013-03-11

provider

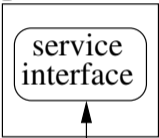

consumer

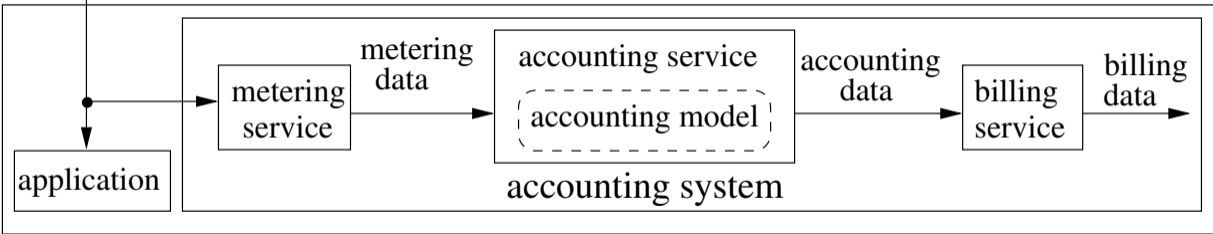

Supplement: 13174_2013_7_MOESM2_ESM.pdf [file 13174_2013_7_MOESM2_ESM.pdf]
