# Supplementary material for: Consumer-centric resource accounting in the cloud
Source: Springer Nature journal article supplement (doi:10.1186/1869-0238-4-8), 2013-03-11

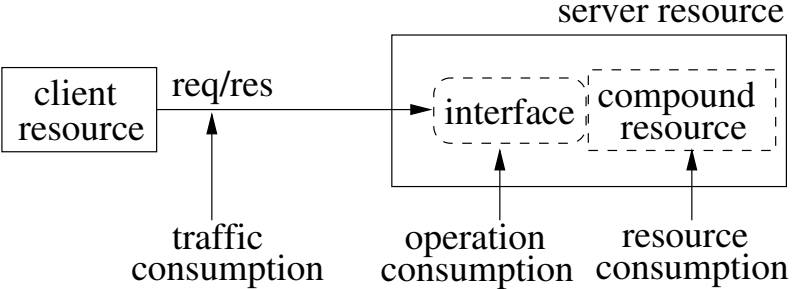

Supplement: 13174_2013_7_MOESM3_ESM.pdf [file 13174_2013_7_MOESM3_ESM.pdf]
