# Supplementary material for: Consumer-centric resource accounting in the cloud
Source: Springer Nature journal article supplement (doi:10.1186/1869-0238-4-8), 2013-03-11
Supplement: 13174_2013_7_MOESM4_ESM.pdf [file 13174_2013_7_MOESM4_ESM.pdf]

PUT Object.zip *into* MYBUCKET

10 char

8 char

295198 bytes  
of data

1537 bytes  
of metadata

Storage consump. from Usage Reports: 295216 bytes
