# Supplementary material for: Consumer-centric resource accounting in the cloud
Source: Springer Nature journal article supplement (doi:10.1186/1869-0238-4-8), 2013-03-11
Supplement: 13174_2013_7_MOESM6_ESM.pdf [file 13174_2013_7_MOESM6_ESM.pdf]

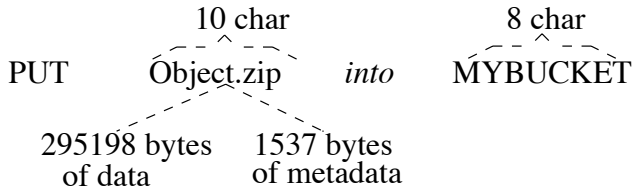

Bandwidth consump. (DataTransferIn) from usage reports: 295198 bytes

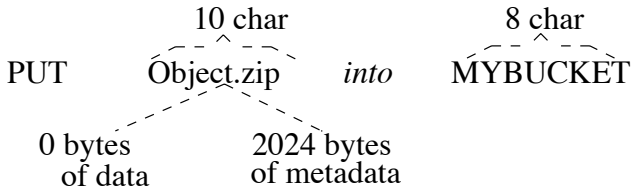

Bandwidth consump. (DataTransferIn) from usage reports: 0 bytes
