# Supplementary material for: Consumer-centric resource accounting in the cloud
Source: Springer Nature journal article supplement (doi:10.1186/1869-0238-4-8), 2013-03-11
Supplement: 13174_2013_7_MOESM7_ESM.pdf [file 13174_2013_7_MOESM7_ESM.pdf]

```
CREATE MYBUCKET // MYBUCKET already exists
```

Response: Error:BucketAlreadyExists

Bandwidth consump. (DataTransferIn) from  
usage reports: 574 bytes

Bandwidth consump. (DataTransferOut) from  
usage reports: 514 bytes

Operation consump. (RequestTier2) from  
usage reports: 1
